# Supplementary material for: Prediction of the hardest BiFeO3 from first-principles calculations
Source: Royal Society of Chemistry journal article supplement (doi:10.1039/d2cp05817k), 2023-01-01
Supplement: d2cp05817k1.pdf [file d2cp05817k1.pdf]

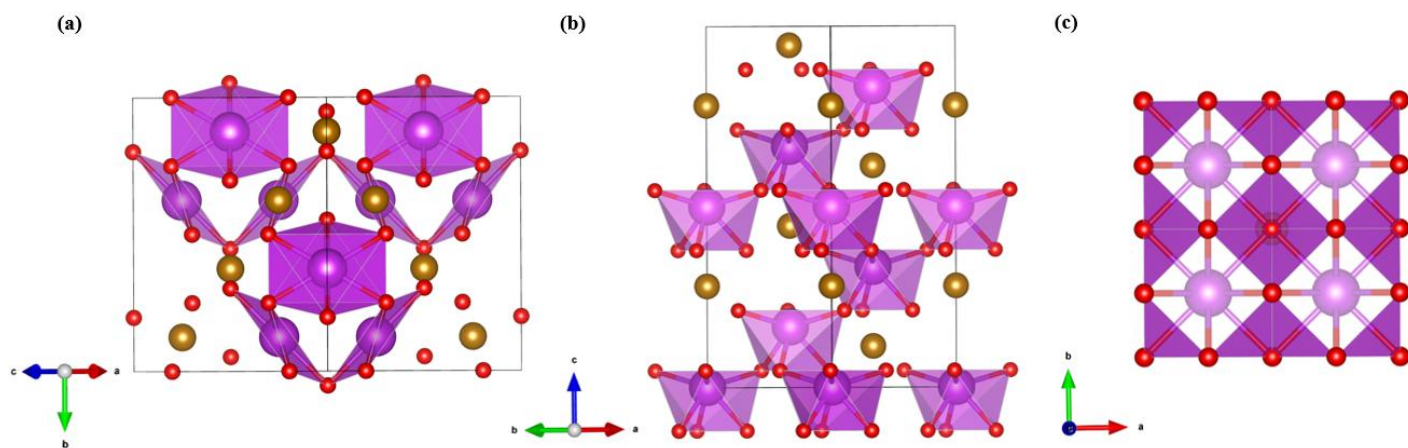

**Fig. S1** Bi-O octahedrons of  $Fd\bar{3}m$ -BiFeO<sub>3</sub> (a),  $R3c$ -BiFeO<sub>3</sub> (b) and  $Pm\bar{3}m$ -BiFeO<sub>3</sub> (c). The purple, yellow and red spheres represent the Bi, Fe, and O atoms, respectively.

#### The local coordination spheres of Fe:

Firstly, the O<sub>1</sub>-Fe-O<sub>6</sub> angle of  $R3c$  is 167.1° (Fig. S3b), while the O<sub>1</sub>-Fe-O<sub>4</sub> angles of  $Fd\bar{3}m$  and  $Pm\bar{3}m$  are 180° (Fig. S2a and S2c). Secondly, the Fe-O octahedron of  $Pm\bar{3}m$  is a standard cubic perovskite structure (centrosymmetric). The O<sub>1</sub>-Fe-O<sub>2</sub> angle of  $Fd\bar{3}m$  is 86.1°, which is slightly twisted from  $Pm\bar{3}m$ . Thirdly, there are two types of Fe-O bond lengths in  $R3c$ , i.e., 2.119 Å (Fe-O<sub>1</sub>, Fe-O<sub>2</sub>, Fe-O<sub>3</sub>) and 1.994 Å (Fe-O<sub>4</sub>, Fe-O<sub>5</sub>, Fe-O<sub>6</sub>), while all the Fe-O bond lengths in  $Fd\bar{3}m$  and  $Pm\bar{3}m$  are 1.895 Å and 1.930 Å, respectively. (Table SI) The Fe-O bond lengths in  $Fd\bar{3}m$  is the shortest one in the BiFeO<sub>3</sub> system, which makes its structure most compact and has superior elastic properties.

#### The local coordination spheres of Bi:

Firstly, the O<sub>1</sub>-Bi-O<sub>4</sub> angle of  $Fd\bar{3}m$  is 62.7° (Fig. S2d), while the O<sub>1</sub>-Bi-O<sub>2</sub> angles of  $R3c$  is 113.6° (Fig.S2e). Secondly, there are two types of Bi-O bond lengths in  $R3c$ , i.e., 2.480 Å (Bi-O<sub>1</sub>, Bi-O<sub>2</sub>, Bi-O<sub>3</sub>) and 2.335 Å (Bi-O<sub>4</sub>, Bi-O<sub>5</sub>, Bi-O<sub>6</sub>), while all the Bi-O bond lengths in  $Fd\bar{3}m$  and  $Pm\bar{3}m$  are 2.485 Å and 2.729 Å, respectively. (Table SI). Thirdly,  $Pm\bar{3}m$  is a standard cubic perovskite structure and the local coordination number of Bi atom is 12, thus it forms the BO<sub>12</sub> octahedron (Fig.S2f).

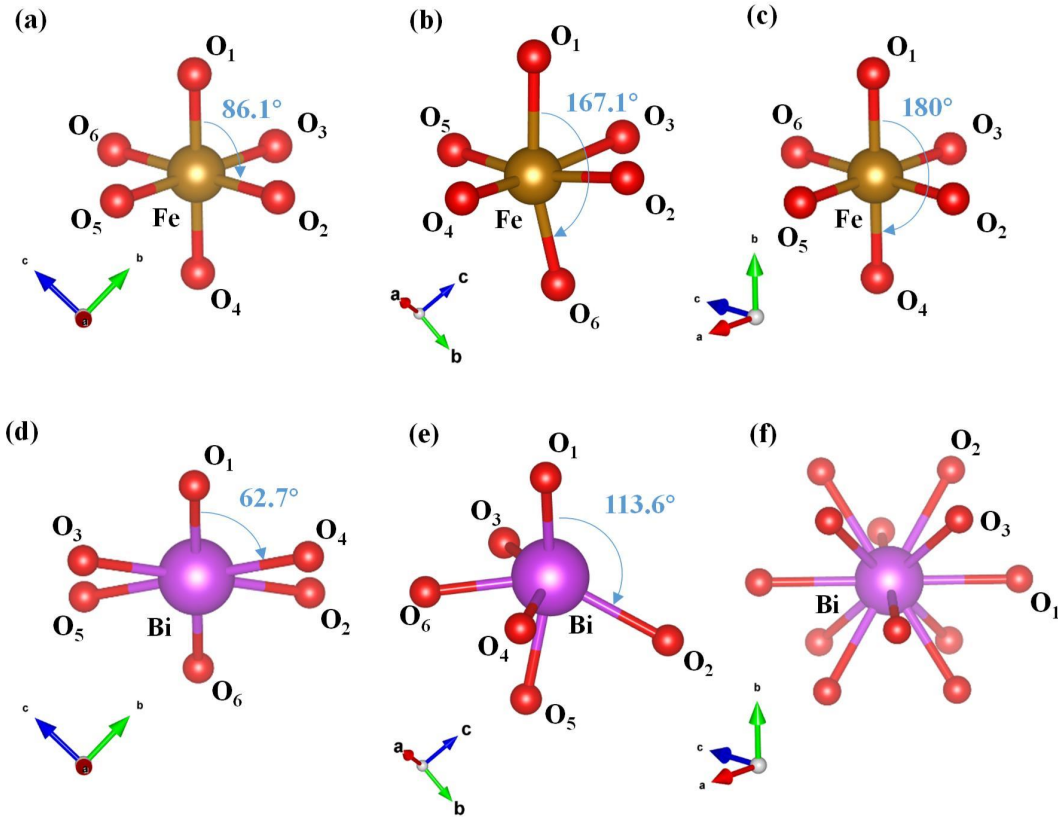

**Fig. S2** The atomic coordination situation of Fe in  $Fd\bar{3}m$  (a),  $R3c$  (b) and  $Pm\bar{3}m$  (c). The atomic coordination situation of Bi in  $Fd\bar{3}m$  (d),  $R3c$  (e) and  $Pm\bar{3}m$  (f).

**Table SI** Bond lengths ( $\text{\AA}$ ) of  $Fd\bar{3}m$ ,  $R3c$  and  $Pm\bar{3}m$ .

| Bond              | $Fd\bar{3}m$ | $R3c$  | $Pm\bar{3}m$ |
|-------------------|--------------|--------|--------------|
| Fe-O <sub>1</sub> | 1.8950       | 2.1185 | 1.9297       |
| Fe-O <sub>2</sub> | 1.8950       | 2.1185 | 1.9297       |
| Fe-O <sub>3</sub> | 1.8950       | 2.1185 | 1.9297       |
| Fe-O <sub>4</sub> | 1.8950       | 1.9942 | 1.9297       |
| Fe-O <sub>5</sub> | 1.8950       | 1.9942 | 1.9297       |
| Fe-O <sub>6</sub> | 1.8950       | 1.9942 | 1.9297       |
| Bi-O <sub>1</sub> | 2.4851       | 2.4802 | 2.7288       |
| Bi-O <sub>2</sub> | 2.4851       | 2.4802 | 2.7288       |
| Bi-O <sub>3</sub> | 2.4851       | 2.4802 | 2.7288       |
| Bi-O <sub>4</sub> | 2.4851       | 2.3345 | 2.7288       |
| Bi-O <sub>5</sub> | 2.4851       | 2.3345 | 2.7288       |
| Bi-O <sub>6</sub> | 2.4851       | 2.3345 | 2.7288       |

**Table SII** Lattice parameters and Wyckoff position of  $Fd\bar{3}m$ -BiFeO<sub>3</sub>,  $R3c$ -BiFeO<sub>3</sub> and  $Pm\bar{3}m$ -BiFeO<sub>3</sub>.

| Phase        | Parameters ( $\text{\AA}$ , degree)        | Wyckoff Position |      |       |       |       |
|--------------|--------------------------------------------|------------------|------|-------|-------|-------|
|              |                                            | atom             | site | x     | y     | z     |
| $Fd\bar{3}m$ | $a=b=c=9.9189$<br>$\alpha=\beta=\gamma=90$ | Bi               | 8a   | 0.125 | 0.625 | 0.625 |
|              |                                            | Fe               | 48f  | 0.375 | 0.125 | 0.875 |
|              |                                            | O                | 96g  | 0.5   | 0.803 | 1.000 |

|              |                                                                  |    |     |       |       |       |
|--------------|------------------------------------------------------------------|----|-----|-------|-------|-------|
| $R3c$        | $a=b=5.6156$<br>$c=14.0816$<br>$\alpha=\beta=90$<br>$\gamma=120$ | Bi | 18b | 0.667 | 0.333 | 0.832 |
|              |                                                                  | Fe | 6a  | 0.000 | 0.000 | 0.778 |
|              |                                                                  | O  | 18b | 0.085 | 0.768 | 0.877 |
| $Pm\bar{3}m$ | $a=b=c=3.8591$<br>$\alpha=\beta=\gamma=90$                       | Bi | 1a  | 0.000 | 0.000 | 0.000 |
|              |                                                                  | Fe | 1b  | 0.500 | 0.500 | 0.500 |
|              |                                                                  | O  | 3c  | 0.500 | 0.000 | 0.500 |

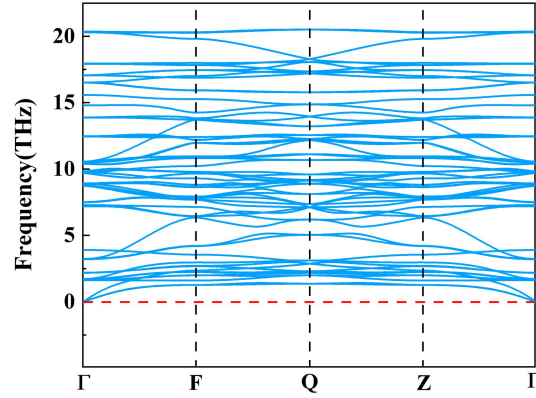

**Fig. S3** The Phonon dispersion curve of  $Fd\bar{3}m$ - $\text{BiFeO}_3$ .

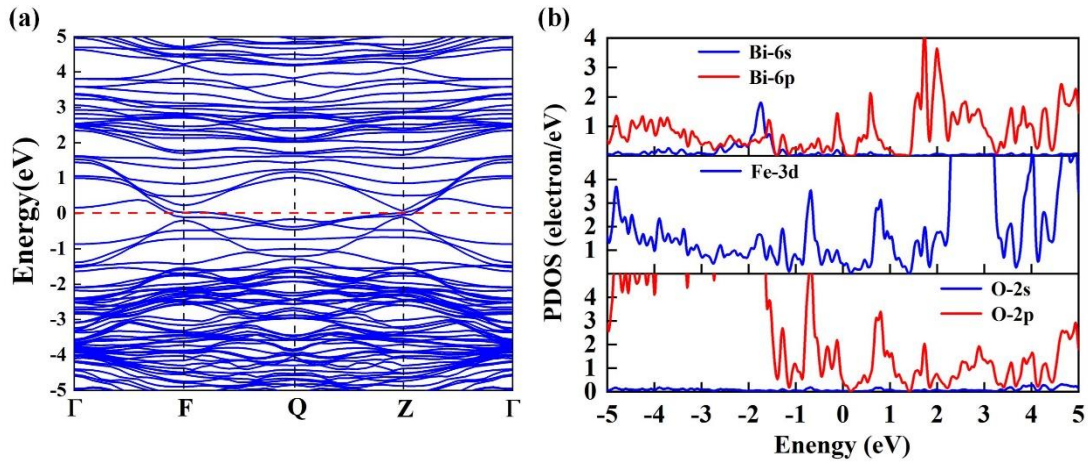

**Fig. S4** The band structure (a) and PDOS (b) of  $Fd\bar{3}m$ - $\text{BiFeO}_3$  based on the HSE06 hybrid exchange-correlation functional.

**Table SIII** The elastic properties of the predicted  $\text{BiFeO}_3$  structures with lower energy, including equilibrium volume  $V_0$  ( $\text{\AA}^3/\text{atom}$ ), bulk modulus  $B_0$  (GPa), and its pressure derivative  $B'_0$  obtained by fitting calculated total energy to EoS, elastic constants  $c_{ij}$ 's (GPa) calculated from equilibrium structure, bulk modulus  $B$  (GPa), and shear modulus  $G$  (GPa), Young's modulus  $E$  (GPa),  $k = B/G$  ratio, Vickers hardness  $H_V$  (GPa), Debye temperature  $\Theta_D$  (K), Poisson's ratio  $\nu$  calculated by Voight-Reuss-Hill method.

| Materials | $\text{BiFeO}_3$ |        |        |              |        |          |        |        |            |        |          |        |        |        |
|-----------|------------------|--------|--------|--------------|--------|----------|--------|--------|------------|--------|----------|--------|--------|--------|
|           | $Fd\bar{3}m$     | $R3c$  | $P4mm$ | $Pm\bar{3}m$ | $C2/m$ | $P2_1/c$ | $C2/c$ | $Cc$   | $P\bar{1}$ | $P6_3$ | $P6_322$ | $Pnma$ | $Cmcm$ | $Imma$ |
| $c_{11}$  | 256.82           | 223.74 | 180.60 | 238.99       | 205.21 | 216.42   | 223.18 | 255.02 | 218.50     | 168.18 | 169.72   | 231.03 | 252.89 | 209.66 |
| $c_{12}$  | 117.12           | 115.95 | 86.66  | 128.89       | 51.71  | 79.01    | 105.19 | 115.47 | 112.94     | 150.09 | 150.39   | 131.67 | 76.83  | 121.02 |
| $c_{13}$  | 117.12           | 54.21  | 51.43  | 128.89       | 116.28 | 68.09    | 113.17 | 116.98 | 120.56     | 82.75  | 83.43    | 119.28 | 82.44  | 52.97  |
| $c_{14}$  | 0                | 16.27  | 0      | 0            | -24.51 | 0        | 0      | 0      | 16.53      | 0      | 0        | 0      | 0      | -22.51 |
| $c_{33}$  | 256.82           | 149.80 | 104.48 | 238.99       | 123.29 | 112.37   | 256.89 | 213.31 | 247.71     | 228.98 | 229.27   | 246.90 | 219.73 | 133.46 |

|          |        |        |        |        |        |        |        |        |        |        |        |        |        |         |
|----------|--------|--------|--------|--------|--------|--------|--------|--------|--------|--------|--------|--------|--------|---------|
| $c_{44}$ | 99.23  | 47.59  | 39.47  | 56.86  | 63.29  | 51.31  | 47.54  | 62.78  | 40.93  | 55.80  | 56.07  | 73.379 | 81.27  | 32.93   |
| $c_{66}$ | 99.23  | 53.90  | 82.57  | 56.86  | 14.55  | 36.95  | 60.61  | 72.15  | 57.88  | 9.07   | 9.67   | 85.75  | 21.80  | 44.25   |
| $G_V$    | 85.12  | 54.67  | 50.71  | 56.13  | 42.96  | 45.43  | 56.85  | 70.51  | 51.44  | 40.74  | 41.12  | 62.34  | 60.96  | 43.91   |
| $G_R$    | 82.36  | 48.20  | 45.89  | 56.12  | 25.37  | 38.21  | 54.02  | 68.09  | 46.98  | 18.55  | 19.52  | 58.56  | 48.17  | 27.85   |
| $G_H$    | 83.74  | 51.44  | 48.30  | 56.13  | 34.17  | 41.82  | 55.44  | 69.30  | 49.21  | 29.64  | 30.32  | 60.49  | 54.57  | 35.88   |
| $B_V$    | 164.28 | 116.22 | 93.86  | 165.59 | 108.36 | 98.96  | 157.47 | 150.47 | 152.16 | 133    | 133.69 | 161.67 | 130.30 | 111.69  |
| $B_R$    | 164.24 | 106.54 | 83.67  | 165.59 | 96.55  | 84.61  | 150.85 | 156.28 | 149.66 | 132.98 | 133.66 | 161.59 | 129.55 | 99.67   |
| $B_H$    | 164.25 | 111.38 | 88.76  | 165.59 | 102.45 | 91.79  | 154.17 | 158.37 | 150.91 | 132.99 | 133.68 | 161.63 | 129.92 | 105.68  |
| $E$      | 214.72 | 133.73 | 122.66 | 151.29 | 92.24  | 108.92 | 148.51 | 188.28 | 133.15 | 82.78  | 84.57  | 161.24 | 143.60 | 96.70   |
| $\nu$    | 0.28   | 0.30   | 0.27   | 0.35   | 0.35   | 0.30   | 0.34   | 0.37   | 0.35   | 0.40   | 0.40   | 0.33   | 0.32   | 0.35    |
| $k$      | 0.51   | 0.46   | 0.54   | 0.34   | 0.33   | 0.47   | 0.36   | 0.37   | 0.33   | 0.22   | 0.23   | 0.37   | 0.42   | 0.34    |
| $H_V$    | 9.12   | 5.12   | 6.48   | 2.95   | 3.09   | 4.47   | 3.43   | 4.51   | 2.62   | 1.37   | 1.42   | 4.33   | 6.06   | 3.11    |
| K        | 451.97 | 357.53 | 350.06 | 369.50 | 293.20 | 323.42 | 370.30 | 407.93 | 349.83 | 279.21 | 282.26 | 386.50 | 366.61 | 300.072 |

**Table SIV** The elastic properties of BiFeO<sub>3</sub> reported recently<sup>1, 2</sup>, for the same space group, we select the lowest energy for calculation. Including equilibrium volume  $V_0$  (Å<sup>3</sup>/atom), bulk modulus  $B_0$  (GPa), and its pressure derivative  $B'_0$  obtained by fitting calculated total energy to EoS, elastic constants  $c_{ij}$ 's (GPa) calculated from equilibrium structure, bulk modulus  $B$  (GPa), and shear modulus  $G$  (GPa), Young's modulus  $E$  (GPa),  $k = B/G$  ratio, Vickers hardness  $H_V$  (GPa), Debye temperature K (K), Poisson's ratio  $\nu$  calculated by Voight-Reuss-Hill method.

| Materials | BiFeO <sub>3</sub> |        |        |          |          |          |        |        |            |          |          |        |        |        |        |        |
|-----------|--------------------|--------|--------|----------|----------|----------|--------|--------|------------|----------|----------|--------|--------|--------|--------|--------|
| Groups    | $Fd\bar{3}m$       | $R3c$  | $Pnma$ | $Pmc2_1$ | $Cmc2_1$ | $P2_1/c$ | $Cm$   | $Cc$   | $P\bar{1}$ | $P2_1/m$ | $Pmn2_1$ | $Ima2$ | $Pbca$ | $Pbam$ | $P2_1$ | $Pm$   |
| $c_{11}$  | 256.82             | 223.74 | 231.03 | 142.34   | 146.09   | 216.42   | 255.39 | 255.02 | 218.50     | 214.33   | 143.56   | 153.51 | 226.46 | 229.35 | 222.34 | 254.13 |
| $c_{12}$  | 117.12             | 115.95 | 131.67 | 38.65    | 39.54    | 79.01    | 115.95 | 115.47 | 112.94     | 77.42    | 38.93    | 76.37  | 127.61 | 129.38 | 115.36 | 112.54 |
| $c_{13}$  | 117.12             | 54.21  | 119.28 | 80.46    | 82.11    | 68.09    | 117.38 | 116.98 | 120.56     | 65.65    | 81.25    | 36.04  | 113.46 | 119.90 | 122.57 | 116.97 |
| $c_{14}$  | 0                  | 16.27  | 0      | 0        | 0        | 0        | 0      | 0      | 16.53      | 0        | 0        | 0      | 0      | 0      | 11.65  | 0      |
| $c_{33}$  | 256.82             | 149.80 | 246.90 | 82.65    | 84.02    | 112.37   | 214.96 | 213.31 | 247.71     | 110.26   | 83.76    | 107.45 | 223.35 | 235.56 | 249.56 | 213.45 |
| $c_{44}$  | 99.23              | 47.59  | 73.38  | 35.01    | 35.42    | 51.31    | 63.08  | 62.78  | 40.93      | 50.35    | 35.35    | 25.21  | 71.23  | 72.65  | 45.71  | 61.97  |
| $c_{66}$  | 99.23              | 53.90  | 85.75  | 54.98    | 56.13    | 36.95    | 72.85  | 72.15  | 57.88      | 35.68    | 55.67    | 50     | 84.65  | 84.97  | 58.22  | 71.58  |
| $G_V$     | 85.12              | 54.67  | 62.34  | 36.88    | 37.18    | 45.43    | 70.93  | 70.51  | 51.44      | 44.69    | 37.02    | 44.35  | 61.65  | 61.98  | 52.35  | 70.93  |
| $G_R$     | 82.36              | 48.20  | 58.56  | 34.59    | 21.02    | 38.21    | 68.53  | 68.09  | 46.98      | 37.35    | 35.96    | 39.75  | 60.46  | 61.56  | 48.06  | 67.62  |
| $G_H$     | 83.74              | 51.44  | 60.49  | 35.46    | 29.10    | 41.82    | 69.80  | 69.30  | 49.21      | 41.32    | 36.23    | 42.05  | 60.23  | 61.73  | 50.65  | 68.12  |
| $B_V$     | 164.28             | 116.22 | 161.67 | 78.47    | 79.22    | 98.96    | 150.96 | 150.47 | 152.16     | 98.73    | 79.02    | 73.89  | 159.65 | 160.32 | 153.97 | 150.26 |
| $B_R$     | 164.24             | 106.54 | 161.59 | 75.95    | 76.02    | 84.61    | 156.76 | 156.28 | 149.66     | 83.46    | 75.99    | 67.13  | 159.62 | 160.30 | 150.72 | 155.46 |
| $B_H$     | 164.25             | 111.38 | 161.63 | 76.92    | 77.62    | 91.79    | 158.85 | 158.37 | 150.91     | 90.65    | 77.35    | 70.51  | 159.63 | 160.31 | 151.51 | 157.15 |
| $E$       | 214.72             | 133.73 | 161.24 | 76.52    | 77.60    | 108.92   | 189.04 | 188.28 | 133.15     | 108.26   | 76.92    | 105.23 | 160.32 | 162.97 | 139.54 | 185.16 |
| $\nu$     | 0.28               | 0.30   | 0.33   | 0.33     | 0.33     | 0.30     | 0.38   | 0.37   | 0.35       | 0.30     | 0.31     | 0.25   | 0.33   | 0.34   | 0.35   | 0.38   |
| $k$       | 0.51               | 0.46   | 0.37   | 0.37     | 0.38     | 0.47     | 0.38   | 0.37   | 0.33       | 0.46     | 0.36     | 0.60   | 0.39   | 0.36   | 0.33   | 0.37   |
| $H_V$     | 9.12               | 5.12   | 4.33   | 3.57     | 3.81     | 4.47     | 4.67   | 4.51   | 2.62       | 4.30     | 3.69     | 6.68   | 4.19   | 4.29   | 3.75   | 4.51   |
| K         | 451.97             | 357.53 | 386.50 | 266.23   | 268.29   | 323.42   | 408.26 | 407.93 | 349.83     | 321.43   | 267.56   | 318.60 | 385.76 | 385.36 | 350.94 | 405.68 |

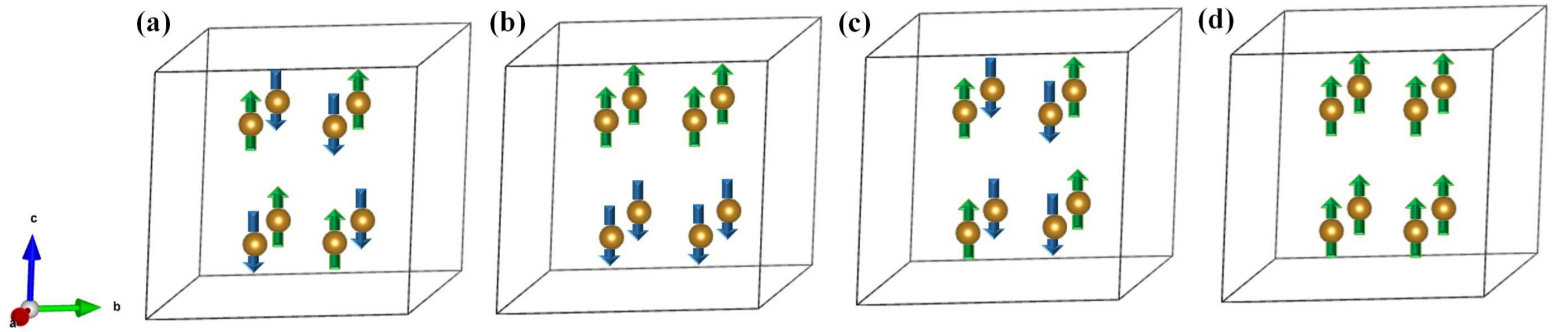

**Fig. S5** Different magnetic patterns are considered for  $\text{BiFeO}_3$ . The green and blue arrows indicate the spin up and down of the iron atoms, respectively. For clarity, only the iron atoms are shown in the  $2 \times 2 \times 1$  cell. (a) G-AFM ordering, (b) A-AFM ordering, (c) C-AFM ordering, (d) FM ordering.

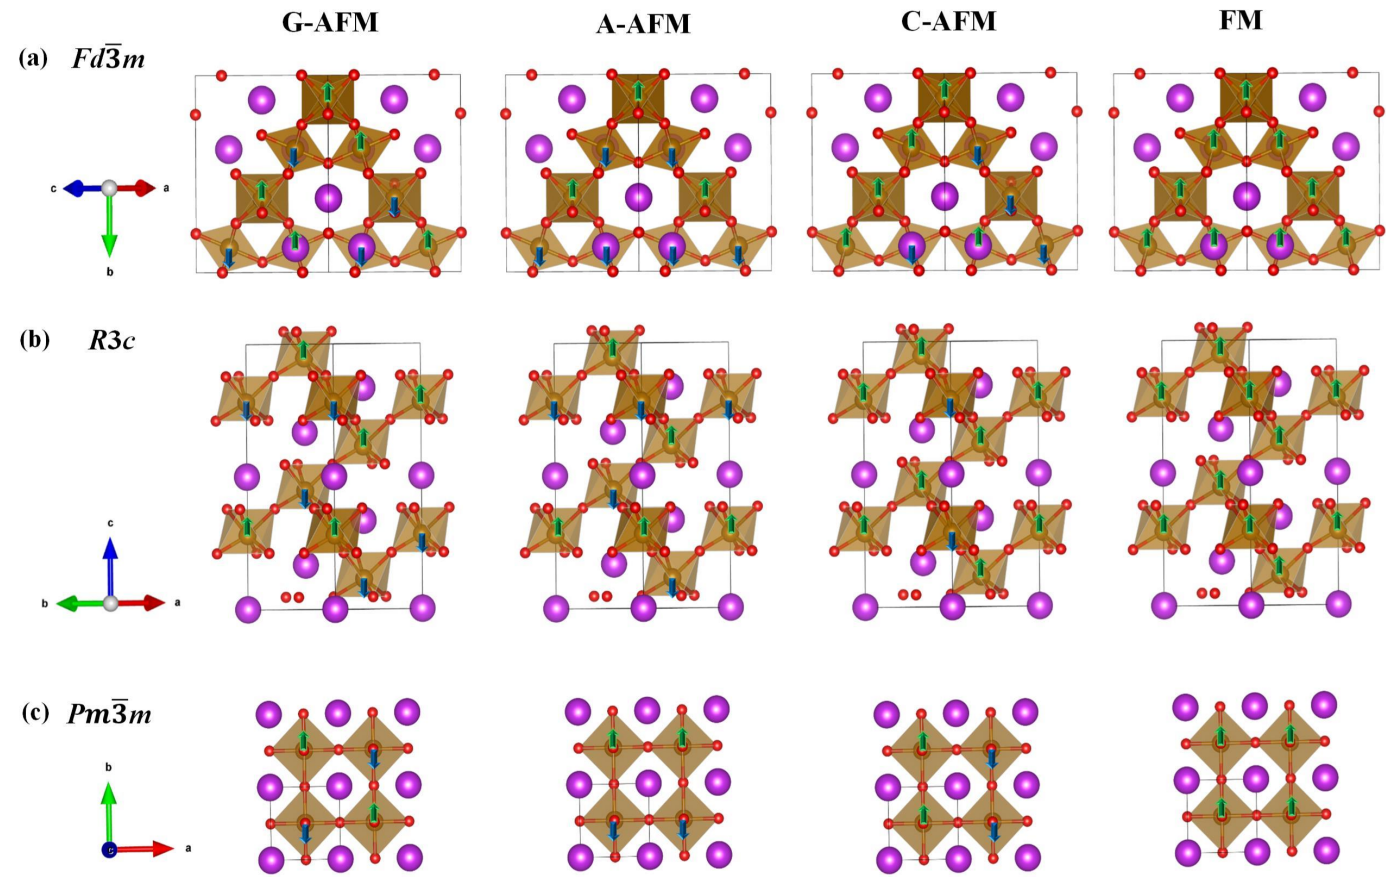

**Fig. S6** Crystal structure diagrams of  $Fd\bar{3}m$ - $\text{BiFeO}_3$  (a),  $R3c$ - $\text{BiFeO}_3$  (b) and  $Pm\bar{3}m$ - $\text{BiFeO}_3$  (c), whose magnetic orderings consider G-AFM ordering, A-AFM ordering, C-AFM ordering, and FM ordering, respectively. The green and blue arrows indicate the spin up and down of iron atoms, respectively.

## REFERENCES

1. B. F. Grosso and N. A. Spaldin, *Phys. Rev. Mater.*, 2021, **5**, 054403.
2. B. F. Grosso, N. A. Spaldin and A. M. Tehrani, *J. Phys. Chem. Lett.*, 2022, **13**, 7342-7349.
